# Supplementary material for: Stability of Methylphenidate under Various pH Conditions in the Presence or Absence of Gut Microbiota
Source: MDPI journal article supplement (doi:10.3390/ph14080733), 2021-07-27
Supplement: s1 [file s1]

## Supplementary figures

**Table S1.** Constituents of enriched beef broth medium used in this study.

| Salt and carbon sources         |       | Vitamin solution       |        | Trace elements                                      |       |
|---------------------------------|-------|------------------------|--------|-----------------------------------------------------|-------|
| Component                       | g/L   | Component              | g/L    | Component                                           | g/L   |
| Glucose                         | 2.000 | D-Biotin               | 0.0020 | EDTA                                                | 1.000 |
| NaCl                            | 0.080 | D-Panthoteic acid      | 0.0100 | ZnSO <sub>4</sub> .7H <sub>2</sub> O                | 0.178 |
| K <sub>2</sub> HPO <sub>4</sub> | 5.310 | Ca2.Nicatinamide       | 0.0050 | MnSO <sub>4</sub> .7H <sub>2</sub> O                | 0.452 |
| KH <sub>2</sub> PO <sub>4</sub> | 2.650 | Vitamine B12           | 0.0005 | FeSO <sub>4</sub> .7H <sub>2</sub> O                | 0.100 |
| NaHCO <sub>3</sub>              | 0.400 | Para-aminobenzoic acid | 0.0050 | CoSO <sub>4</sub> .7H <sub>2</sub> O                | 0.181 |
| Beef extract                    | 5.000 | Riboflavin             | 0.0050 | CuSO <sub>4</sub> .7H <sub>2</sub> O                | 0.010 |
| Yeast extract                   | 3.000 | Folic acid             | 0.0020 | H <sub>3</sub> BO <sub>3</sub>                      | 0.010 |
| Peptone                         | 0.600 | Pyridoxal-5-Phosphate  | 0.0100 | Na <sub>2</sub> MoO <sub>4</sub> .2H <sub>2</sub> O | 0.010 |
| CaCl <sub>2</sub>               | 0.008 | Vitamin K1             | 0.0005 | NiSO <sub>4</sub> .6H <sub>2</sub> O                | 0.111 |
| MgSO <sub>4</sub>               | 0.008 | Thiamin HCl            | 0.0040 |                                                     |       |
| Cysteine                        | 0.500 |                        |        |                                                     |       |

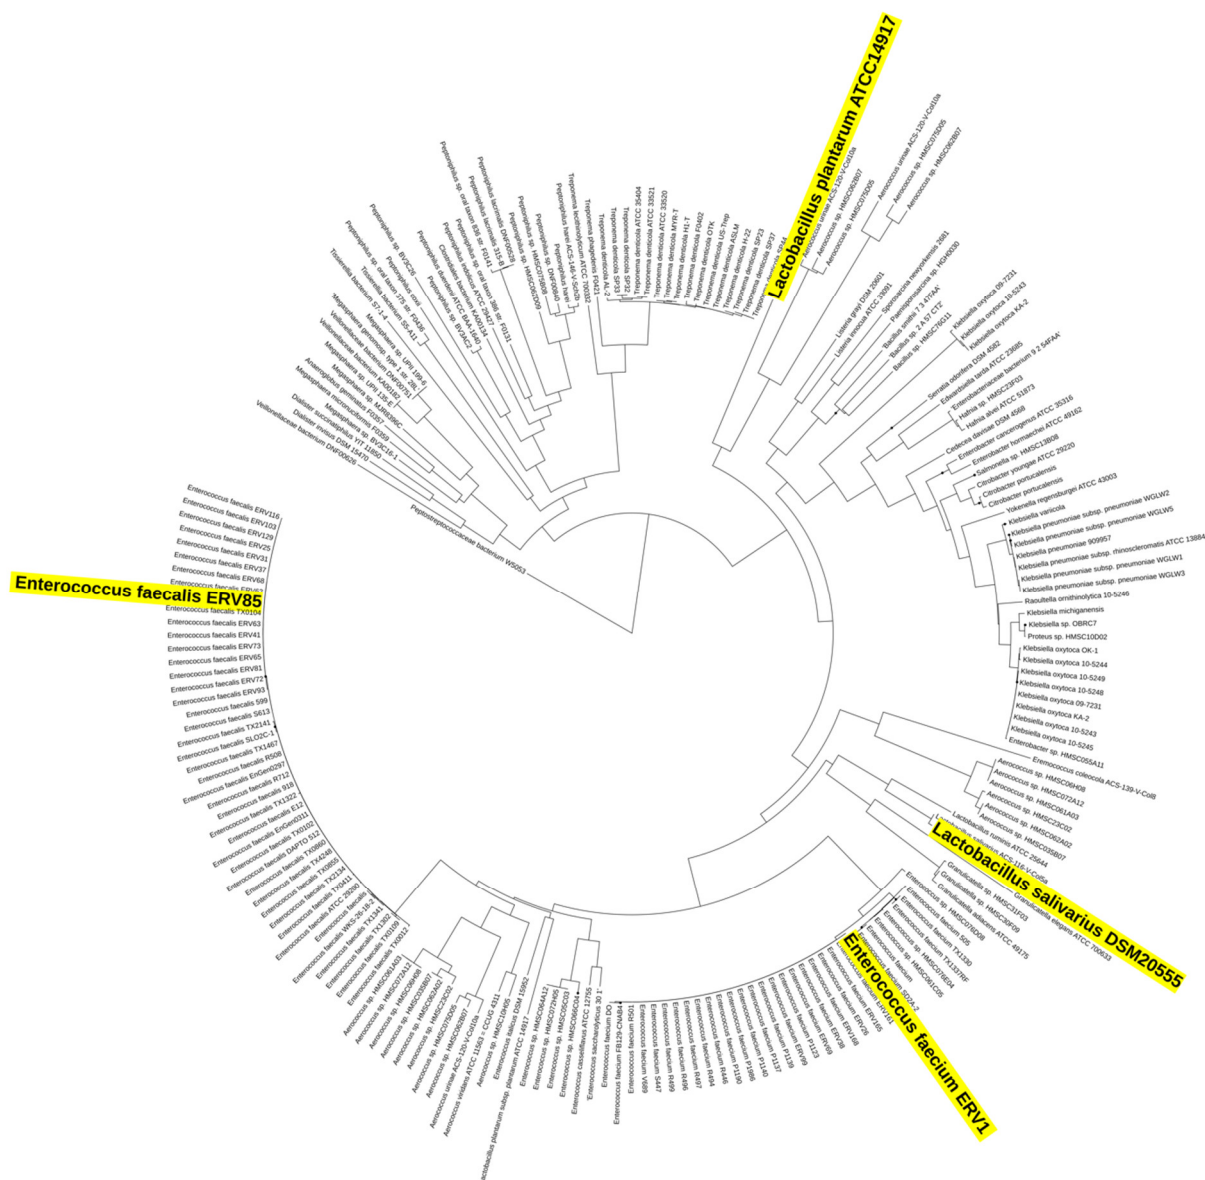

**Figure S1. *In-silico* analysis of bacterial homologues of *E.coli* yjfp.** Phylogenetic tree created with iTOL online tool showing gut bacterial strains carrying yjfp esterase orthologues below the 30% identity cut-off of the alignment model. Highlighted in yellow are the bacteria selected for our screening of methylphenidate hydrolyzing bacteria.

A

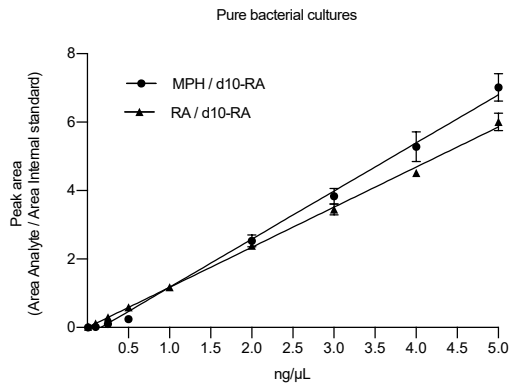

B

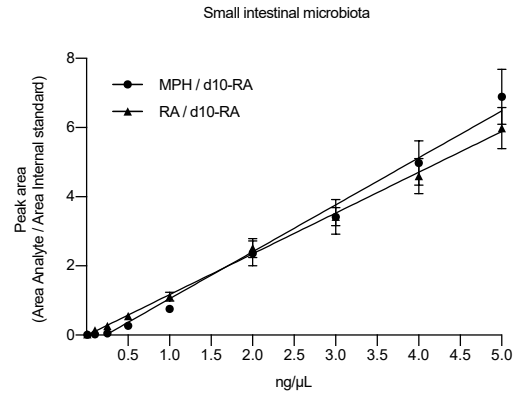

C

| Matrix                      | Calibration line slope | Calibration line intercept | Correlation coefficient ( $r^2$ ) |
|-----------------------------|------------------------|----------------------------|-----------------------------------|
| Bacterial pure cultures     |                        |                            |                                   |
| MPH                         | $1.407 \pm 0.03511$    | $-0.2332 \pm 0.09148$      | 0.9983                            |
| RA                          | $1.172 \pm 0.01751$    | $-0.00112 \pm 0.04342$     | 0.9984                            |
| Small intestinal microbiota |                        |                            |                                   |
| MPH                         | $1.398 \pm 0.04149$    | $-0.3152 \pm 0.1029$       | 0.9784                            |
| RA                          | $1.152 \pm 0.02431$    | $-0.01052 \pm 0.06028$     | 0.9890                            |

**Figure S2. (A, B)** Calibration curves obtained in the two different biological matrices used in this study: **(A)** pure bacterial cultures of *E. coli* BW25113 and **(B)** pool of small intestinal content of 5 WTG rats. Peak areas of methylphenidate (MPH) and ritalinic acid (RA) are normalized to the peak area of the internal standard d10-Ritalinic acid (d10-RA). **(C)** Linearity of the calibration curves fitted with a linear regression model. Data represents 3 biological replicates and error bars represent standard deviation.

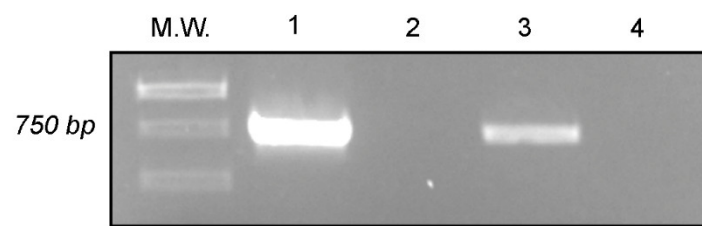

**Figure. S3 PCR of bacterial esterases.** Amplification of the *E. coli* yjgP gene (accession: CP015085) in **(1)** *E. coli* BW25113, **(2)** *E. coli* BW25113<sup>ΔyjgP</sup>, **(3)** *E. faecium* W54 and **(4)** no template control.

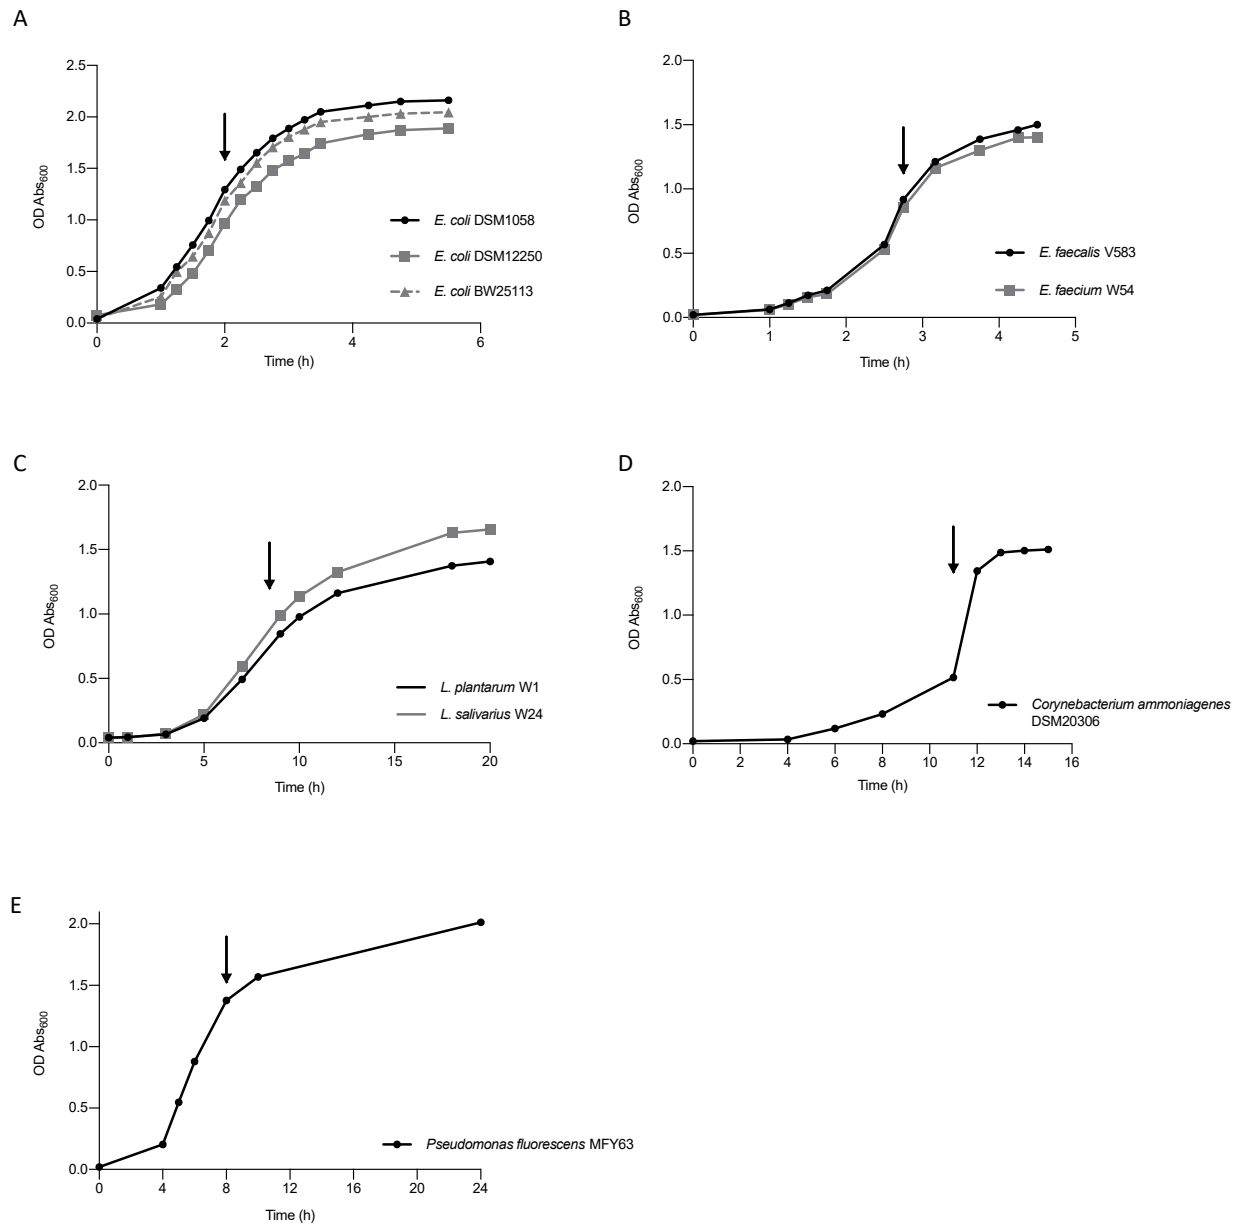

**Figure S4. Growth curves of the strains used in this study.** Optical density measured as the absorbance at 600 nm is plotted over time in aerobic cultures of (A) *E. coli* strains (BW25113, DSM11250 and DSM1058) grown at 37°C, 220 rpm; (B) *Enterococcus* strains (*E. faecalis* V583 and *E. faecium* W54) strains grown at 37°C without agitation (C) *Lactobacillus* strains (*L. plantarum* W1 and *L. salivarius* W24) grown at 37°C, 220 rpm *Enterococcus* strains (*E. faecalis* V583 and *E. faecium* W54) strains grown at 37°C without agitation; (D) *C. ammoniagenes* DSM20306 grown at 37°C, 220 rpm and (E) *P. fluorescens* MFY63 grown at 37°C, 220 rpm. Arrows indicate the late exponential phase when MPH was added.
